# Supplementary material for: Telomere length and incident atrial fibrillation – data of the PREVEND cohort
Source: PubMed Central journal article supplement (PMC5291433; doi:10.1371/journal.pone.0171545), 2017-02-03
Supplement: pone.0171545.s001.pdf [file pone.0171545.s001.pdf]

**Supplementary Table 1. Baseline characteristics according to quartiles.**

| <b>Clinical profile</b>       | <b>1st quartile<br/>(≤ -0.18)<br/>(n=1943)</b> | <b>2nd quartile<br/>(-0.18 - 0.00)<br/>(n=1944)</b> | <b>3rd quartile<br/>(0.00 - 0.20)<br/>(n=1944)</b> | <b>4th quartile<br/>(≥ 0.20)<br/>(n=1944)</b> | <b>P-value for<br/>trend</b> |
|-------------------------------|------------------------------------------------|-----------------------------------------------------|----------------------------------------------------|-----------------------------------------------|------------------------------|
| Age-years                     | 52±13                                          | 49 ±12                                              | 48±12                                              | 46±12                                         | <0.001                       |
| Male sex                      | 1038 (53%)                                     | 1001 (51%)                                          | 942 (48%)                                          | 891 (46%)                                     | <0.001                       |
| BMI-kg/m <sup>2</sup>         | 26.3 (23.7-28.9)                               | 25.6 (23.2-28.6)                                    | 25.4 (23.1-28.3)                                   | 25.1 (22.7-27.7)                              | <0.001                       |
| Obesity                       | 361 (19%)                                      | 317 (16%)                                           | 299 (16%)                                          | 233 (12%)                                     | <0.001                       |
| Systolic blood pressure-mmHg  | 133±21                                         | 129±20                                              | 128±20                                             | 126±19                                        | <0.001                       |
| Diastolic blood pressure-mmHg | 75±10                                          | 74±10                                               | 74±10                                              | 73±10                                         | <0.001                       |
| Heart rate-bpm                | 70±10                                          | 69±10                                               | 69±10                                              | 69±10                                         | 0.002                        |
| Hypertension                  | 658 (34%)                                      | 532 (27%)                                           | 496 (26%)                                          | 407 (21%)                                     | <0.001                       |
| Heart failure                 | 6 (0.3%)                                       | 5 (0.3%)                                            | 6 (0.3%)                                           | 0 (0.0%)                                      | 0.109                        |
| Diabetes mellitus             | 106(6%)                                        | 65 (3%)                                             | 68 (4%)                                            | 46 (2%)                                       | <0.001                       |
| Smoking                       | 911 (47%)                                      | 874 (45%)                                           | 839 (43%)                                          | 818 (42%)                                     | 0.018                        |
| Hypercholesterolemia          | 107 (6%)                                       | 103 (6%)                                            | 70 (4%)                                            | 53 (3%)                                       | <0.001                       |
| Glucose lowering treatment    | 42 (3%)                                        | 24 (1%)                                             | 23 (1%)                                            | 18 (1%)                                       | 0.011                        |

|                                |                     |                       |                      |                     |                          |
|--------------------------------|---------------------|-----------------------|----------------------|---------------------|--------------------------|
| Lipid lowering treatment       | 110 (7%)            | 95 (6%)               | 58 (4%)              | 51 (3%)             | <0.001                   |
| Myocardial infarction          | 85 (4.5%)           | 66 (3.5%)             | 48 (2.5%)            | 29 (1.5%)           | <0.001                   |
| Stroke                         | 16 (0.8%)           | 13 (0.7%)             | 15 (0.8%)            | 10 (0.5%)           | 0.649                    |
| Antihypertensive treatment     | 331 (20%)           | 301 (19%)             | 221 (14%)            | 183 (12%)           | <0.001                   |
| PR-interval-ms                 | 160 (147-173)       | 158 (143-173)         | 157 (143-172)        | 157 (143-170)       | <0.001                   |
| <b>Biomarker profile</b>       | <b>1st quartile</b> | <b>2nd quartile</b>   | <b>3rd quartile</b>  | <b>4th quartile</b> | <b>P-value for trend</b> |
|                                | <b>(≤ -0.18)</b>    | <b>(-0.18 - 0.00)</b> | <b>(0.00 - 0.20)</b> | <b>(≥ 0.20)</b>     |                          |
|                                | <b>(n=1943)</b>     | <b>(n=1944)</b>       | <b>(n=1944)</b>      | <b>(n=1944)</b>     |                          |
| eGFR-ml/min/1.73m <sup>2</sup> | 79.2±14.9           | 80.8±14.8             | 81.1±14.1            | 82.4±14.1           | <0.001                   |
| Creatinine-umol/L              | 84.0 (75.0-93.0)    | 83.0 (74.0-92.0)      | 82.0 (73.0-91.0)     | 80.0 (73.0-90.0)    | <0.001                   |
| NTpro-BNP-ng/L                 | 40.1 (18.0-80.8)    | 36.5 (16.3-71.0)      | 38.5 (16.6-72.9)     | 34.2 (15.6-66.7)    | <0.001                   |
| hs-CRP-mg/L                    | 1.63 (0.72-3.58)    | 1.28 (0.56-3.06)      | 1.18 (0.54-2.73)     | 1.05 (0.48-2.49)    | <0.001                   |
| Glucose-mmol/L                 | 5.1±1.4             | 4.9±1.1               | 4.9±1.2              | 4.7±1.0             | <0.001                   |

Data is expressed as mean ± standard deviation, median (interquartile range) or numbers (%). Telomere lengths are divided in quartiles. Abbreviations: AF=atrial fibrillation, BMI=body mass index, eGFR=estimate glomerular filtration rate, hs-CRP=highly sensitive C-reactive protein, NT pro-BNP=N-terminal prohormone of brain natriuretic peptide.
