# Supplementary material for: Telomere length and incident atrial fibrillation – data of the PREVEND cohort
Source: PubMed Central journal article supplement (PMC5291433; doi:10.1371/journal.pone.0171545), 2017-02-03
Supplement: pone.0171545.s003.pdf [file pone.0171545.s003.pdf]

**Supplementary Table 3. Cox regression models by age categories.**

|                                                                                                                                                                                                                                                                                                                                                                                          | <b>Telomere quartiles</b> | <b>HR(95% CI)</b> | <b>P-value</b> |
|------------------------------------------------------------------------------------------------------------------------------------------------------------------------------------------------------------------------------------------------------------------------------------------------------------------------------------------------------------------------------------------|---------------------------|-------------------|----------------|
| Unadjusted model (individuals aged <50 years)                                                                                                                                                                                                                                                                                                                                            | 1. ( $\leq -0.18$ )       | 1.44(0.31-6.76)   | 0.645          |
|                                                                                                                                                                                                                                                                                                                                                                                          | 2. (-0.18-0.00)           | 1.29(0.37-4.47)   | 0.690          |
|                                                                                                                                                                                                                                                                                                                                                                                          | 3. (0.00-0.20)            | 0.95(0.28-3.26)   | 0.940          |
|                                                                                                                                                                                                                                                                                                                                                                                          | 4. ( $\geq 0.20$ )        | 1                 |                |
| Unadjusted model (individuals aged 50-65 years)                                                                                                                                                                                                                                                                                                                                          | 1. ( $\leq -0.18$ )       | 0.66(0.34-1.29)   | 0.227          |
|                                                                                                                                                                                                                                                                                                                                                                                          | 2. (-0.18-0.00)           | 0.69(0.35-1.37)   | 0.294          |
|                                                                                                                                                                                                                                                                                                                                                                                          | 3. (0.00-0.20)            | 0.62(0.32-1.19)   | 0.148          |
|                                                                                                                                                                                                                                                                                                                                                                                          | 4. ( $\geq 0.20$ )        | 1                 |                |
| Unadjusted model (individuals aged >65 years)                                                                                                                                                                                                                                                                                                                                            | 1. ( $\leq -0.18$ )       | 1.21(0.41-3.61)   | 0.727          |
|                                                                                                                                                                                                                                                                                                                                                                                          | 2. (-0.18-0.00)           | 2.52(0.94-6.74)   | 0.065          |
|                                                                                                                                                                                                                                                                                                                                                                                          | 3. (0.00-0.20)            | 2.70(1.09-6.66)   | 0.031          |
|                                                                                                                                                                                                                                                                                                                                                                                          | 4. ( $\geq 0.20$ )        | 1                 |                |
| <p>Hazard ratios are calculated for quartiles with shorter telomeres with the longest quartile as reference. The telomere length is the ratio of telomere expression divided by reference gene and is standardized per standard deviation. Log transformed T/S ratios were centered around 0. <u>Abbreviations</u>: AF=atrial fibrillation, CI=confidence interval, HR=Hazard ratio.</p> |                           |                   |                |
