# Supplementary material for: Telomere length and incident atrial fibrillation – data of the PREVEND cohort
Source: PubMed Central journal article supplement (PMC5291433; doi:10.1371/journal.pone.0171545), 2017-02-03
Supplement: pone.0171545.s004.pdf [file pone.0171545.s004.pdf]

**Supplementary Table 4. Cox regression models by sex.**

|                                                                                                                                                                                                                                                                                                                                                                                                | <b>Telomere quartiles</b> | <b>HR(95% CI)</b> | <b>P-value</b> |
|------------------------------------------------------------------------------------------------------------------------------------------------------------------------------------------------------------------------------------------------------------------------------------------------------------------------------------------------------------------------------------------------|---------------------------|-------------------|----------------|
| Unadjusted model (women)                                                                                                                                                                                                                                                                                                                                                                       | 1. ( $\leq -0.18$ )       | 1.02(0.40-2.60)   | 0.961          |
|                                                                                                                                                                                                                                                                                                                                                                                                | 2. (-0.18-0.00)           | 1.14(0.51-2.53)   | 0.746          |
|                                                                                                                                                                                                                                                                                                                                                                                                | 3. (0.00-0.20)            | 1.14(0.55-2.39)   | 0.719          |
|                                                                                                                                                                                                                                                                                                                                                                                                | 4. ( $\geq 0.20$ )        | 1                 |                |
| Unadjusted model (men)                                                                                                                                                                                                                                                                                                                                                                         | 1. ( $\leq -0.18$ )       | 1.69(0.90-3.15)   | 0.101          |
|                                                                                                                                                                                                                                                                                                                                                                                                | 2. (-0.18-0.00)           | 2.06(1.13-3.76)   | 0.018          |
|                                                                                                                                                                                                                                                                                                                                                                                                | 3. (0.00-0.20)            | 1.52(0.84-2.76)   | 0.169          |
|                                                                                                                                                                                                                                                                                                                                                                                                | 4. ( $\geq 0.20$ )        | 1                 |                |
| <p>Hazard ratios are calculated for quartiles with shorter telomeres with the longest quartile as reference. The telomere length is the ratio of telomere expression divided by reference gene and is standardized per standard deviation. Log transformed T/S ratios were centered around 0. <u>Abbreviations</u>: AF = atrial fibrillation, CI = confidence interval, HR = Hazard ratio.</p> |                           |                   |                |
